# Supplementary material for: A new concept for correction of instrumental isotopic fractionation in MC-ICP-MS using a pair of monoisotopic elements: a critical evaluation
Source: Royal Society of Chemistry journal article supplement (doi:10.1039/d4ja00117f), 2024-01-01
Supplement: d4ja00117f1.xlsx [file d4ja00117f1.xlsx]

## Sheet: Er, Ho, Tb, Gd
Sample	Ho/Tb vs 160Gd/158Gd	167Er/166Er vs Ho/Tb	167Er/166Er vs 160Gd/158Gd	167Er/166Er vs 160Gd/158Gd	Date	The first row indicates elements of which isotope ratios were studied and calibrators that were used for IIF correction. E.g., 167Er/166Er vs Ho/Tb means that erbium isotope ratios were measured using Ho/Tb pair as a calibrator.
	ORM	ORM	ORM	IS		The second row refers to the correction method that was used.
Er, Gd, Ho, Tb	0.915846				2023-07-04	The third row and all below contain respective corrected isotope ratio values.
Er, Gd, Ho, Tb	0.949404				2023-07-04
Er, Gd, Ho, Tb	0.939568				2023-07-04
Er, Gd, Ho, Tb	0.948089				2023-07-04
Er, Gd, Ho, Tb	0.928426				2023-07-04
Er, Gd, Ho, Tb		0.683362			2023-07-05
Er, Gd, Ho, Tb		0.683004			2023-07-05
Er, Gd, Ho, Tb		0.68295			2023-07-05
Er, Gd, Ho, Tb		0.682904			2023-07-05
Er, Gd, Ho, Tb		0.682995			2023-07-05
Er, Gd, Ho, Tb		0.682762			2023-07-05
Er, Gd, Ho, Tb	0.926587	0.681991	0.682891	0.682754	2023-09-05
Er, Gd, Ho, Tb	0.918219	0.682124	0.682601	0.682843	2023-09-05
Er, Gd, Ho, Tb	0.912973	0.682016	0.682197	0.682879	2023-09-05
Er, Gd, Ho, Tb	0.903048	0.682415	0.682138	0.682881	2023-09-05
Er, Gd, Ho, Tb	0.900083	0.682743	0.682356	0.682878	2023-09-05
Er, Gd, Ho, Tb	0.902888	0.682434	0.682132	0.682874	2023-09-05
Er, Gd, Ho, Tb	0.899347	0.682624	0.682162	0.682879	2023-09-05
Er, Gd, Ho, Tb	0.904052	0.682458	0.682241	0.682888	2023-09-05
Er, Gd, Ho, Tb	0.929821	0.683318	0.683338	0.682852	2023-09-06
Er, Gd, Ho, Tb	0.947071	0.680115	0.682289	0.682937	2023-09-06
Er, Gd, Ho, Tb	0.946167	0.68003	0.682183	0.682934	2023-09-06
Er, Gd, Ho, Tb	0.943235	0.680618	0.682499	0.682915	2023-09-06
Er, Gd, Ho, Tb	0.944911	0.681286	0.681219	0.682839	2023-09-18
Er, Gd, Ho, Tb	0.955239	0.681155	0.681703	0.682794	2023-09-18
Er, Gd, Ho, Tb	0.943405	0.6818	0.681635	0.682803	2023-09-18
Er, Gd, Ho, Tb	0.945537	0.681685	0.681646	0.682804	2023-09-18
Er, Gd, Ho, Tb	0.944169	0.681694	0.681556	0.682738	2023-09-18
Er, Gd, Ho, Tb	0.943268	0.681805	0.681614	0.68281	2023-09-18
Er, Gd, Ho, Tb	0.945284	0.681763	0.6817	0.68279	2023-09-18
Er, Gd, Ho, Tb	0.929139	0.683561	0.6828	0.682776	2023-09-26
Er, Gd, Ho, Tb	0.957712	0.681505	0.682346	0.682846	2023-09-26
Er, Gd, Ho, Tb	0.95258	0.681646	0.682289	0.682819	2023-09-26
Er, Gd, Ho, Tb	0.984075	0.681315	0.683105	0.68293	2023-09-26
Er, Gd, Ho, Tb	0.884309	0.684088	0.682608	0.682983	2023-09-26
Er, Gd, Ho, Tb	1.00392	0.680755	0.682663	0.682957	2023-09-26
Er, Gd, Ho, Tb	0.914179	0.683213	0.682505	0.682951	2023-09-27
Er, Gd, Ho, Tb	0.921697	0.682718	0.682568	0.68297	2023-09-27
Er, Gd, Ho, Tb	0.928962	0.683074	0.682872	0.68291	2023-09-27
Er, Gd, Ho, Tb	0.926096	0.682964	0.682706	0.682925	2023-09-27
Er, Gd, Ho, Tb	0.926402	0.683311	0.68272	0.682903	2023-09-27
Er, Gd, Ho, Tb	0.914178	0.682981	0.682762	0.682901	2023-09-27
Er, Gd, Ho, Tb	0.934895	0.68212	0.682746	0.682911	2023-09-27
Er, Gd, Ho, Tb	0.795486	0.685538	0.683076	0.682925	2023-09-28
Er, Gd, Ho, Tb	0.880922	0.684078	0.682756	0.68295	2023-09-28
Er, Gd, Ho, Tb	0.891614	0.684007	0.682846	0.682956	2023-09-28
Er, Gd, Ho, Tb	0.862024	0.684252	0.68237	0.682884	2023-09-29
Er, Gd, Ho, Tb	0.900675	0.682844	0.682198	0.682895	2023-09-29
Er, Gd, Ho, Tb	0.913402	0.684067	0.682279	0.682789	2023-10-02
Er, Gd, Ho, Tb	0.87584	0.683525	0.681892	0.682817	2023-10-03
Er, Gd, Ho, Tb	0.777242	0.684691	0.681382	0.682856	2023-10-03
Er, Gd, Ho, Tb	1.13273	0.688101	0.68231	0.682867	2023-10-05
Er, Gd, Ho, Tb	0.790381	0.686272	0.682002	0.682887	2023-10-05
Er, Gd, Ho, Tb	1.39664	0.691758	0.68236	0.6829	2023-10-05

## Sheet: Zr, Nb, Y, Sr
Sample	Nb/Y vs 87Sr/86Sr (0.71034)	92Zr/90Zr vs 87Sr/86Sr (0.71034)	92Zr/90Zr vs 87Sr/86Sr (0.71034)	Date
	ORM	ORM	IS
Sr, Zr, Nb, Y	0.528388	0.334299	0.333475	2023-10-12
Sr, Zr, Nb, Y	0.533001	0.332929	0.333523	2023-10-12
Sr, Zr, Nb, Y	0.533738	0.332864	0.333535	2023-10-12
Sr, Zr, Nb, Y	0.54858	0.332739	0.333541	2023-10-12
Sr, Zr, Nb, Y	0.558815	0.332806	0.333543	2023-10-12
Sr, Zr, Nb, Y	0.549788	0.332507	0.333532	2023-10-12
Sr, Zr, Nb, Y	0.592468	0.335203	0.333471	2023-10-13
Sr, Zr, Nb, Y	0.614425	0.333579	0.333562	2023-10-13
Sr, Zr, Nb, Y	0.578351	0.333384	0.333555	2023-10-13
Sr, Zr, Nb, Y		0.334655	0.3335	2023-10-23
Sr, Zr, Nb, Y		0.333444	0.333605	2023-10-23
Sr, Zr, Nb, Y		0.333747	0.333619	2023-10-23
Sr, Zr, Nb, Y		0.333036	0.333626	2023-10-23
Sr, Zr, Nb, Y		0.331701	0.333458	2023-10-24
Sr, Zr, Nb, Y		0.331827	0.333382	2023-10-24
Sr, Zr, Nb, Y		0.332455	0.333487	2023-10-24
Sr, Zr, Nb, Y		0.333375	0.333579	2023-10-25
Sr, Zr, Nb, Y		0.333575	0.333638	2023-10-26
Sr, Zr, Nb, Y		0.333033	0.333727	2023-10-26
Sr, Zr, Nb, Y		0.332843	0.333746	2023-10-26
Sr, Zr, Nb, Y		0.333075	0.333764	2023-10-26
